# Supplementary material
Source: Springer Nature journal article supplement (https://www.springerprofessional.de/resource/supplementary/40327_2013_5_MOESM1_ESM.pdf/10801436)

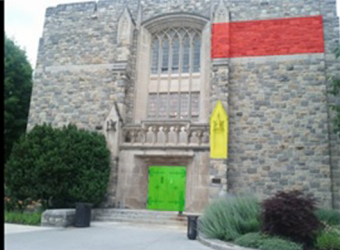

Image name: img\_norris\_34.jpg  
Score: 48.9362 %  
BIM elements: 2  
Focal length: 2560.0 pixels  
FoV(h): 53.130104 degrees  
FoV(v): 41.11209 degrees

Clicked

Name: Door #1  
Desc: Management Report #MR02

Image name: img\_norris\_30.jpg  
Score: 98.788704 %  
BIM elements: 3  
Focal length: 2560.0 pixels  
FoV(h): 53.130104 degrees  
FoV(v): 41.11209 degrees

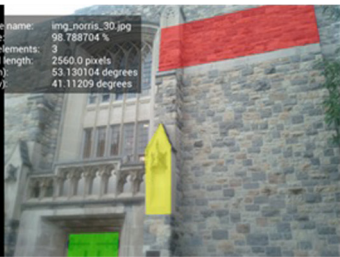

Clicked

Name: Wall #1  
Desc: Progress Report #PR01

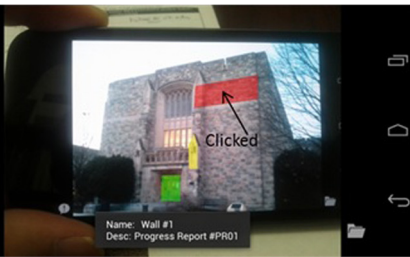

Supplement: MOESM1 [file 10801436]
